# Supplementary material for: Transcription factors form a ternary complex with NIPBL/MAU2 to localize cohesin at enhancers
Source: PubMed Central journal article supplement — bioRxiv. 2025 Feb 19:2024.12.09.627537. Originally published 2024 Dec 9. Preprint. [Version 2] doi: 10.1101/2024.12.09.627537 (PMC11661173; doi:10.1101/2024.12.09.627537), 2025-02-19
Supplement: media-1.pdf [file media-1.pdf]

## Supplementary Materials for

### **Transcription factors form a ternary complex with NIPBL/MAU2 to localize cohesin at enhancers**

Gregory Fettweis\*, Kaustubh Wagh\*, Diana A. Stavreva\*, Alba Jiménez-Panizo\*,  
Sohyoung Kim, Michelle Lion, Andrea Alegre-Martí, Thomas A. Johnson, David A. Ball,  
Tatiana S. Karpova, Arpita Upadhyaya, Didier Vertommen, Juan Fernández Recio, Eva  
Estébanez-Perpiñá, Franck Dequiedt#, and Gordon L. Hager#

\* Co-first authors

# Corresponding authors: F.D. ([fdequiedt@uliege.be](mailto:fdequiedt@uliege.be)), G.L.H.

([hagerg@exchange.nih.gov](mailto:hagerg@exchange.nih.gov))

#### **This PDF includes**

Figures S1 to S4

Tables S1 and S2

Videos S1 and S2

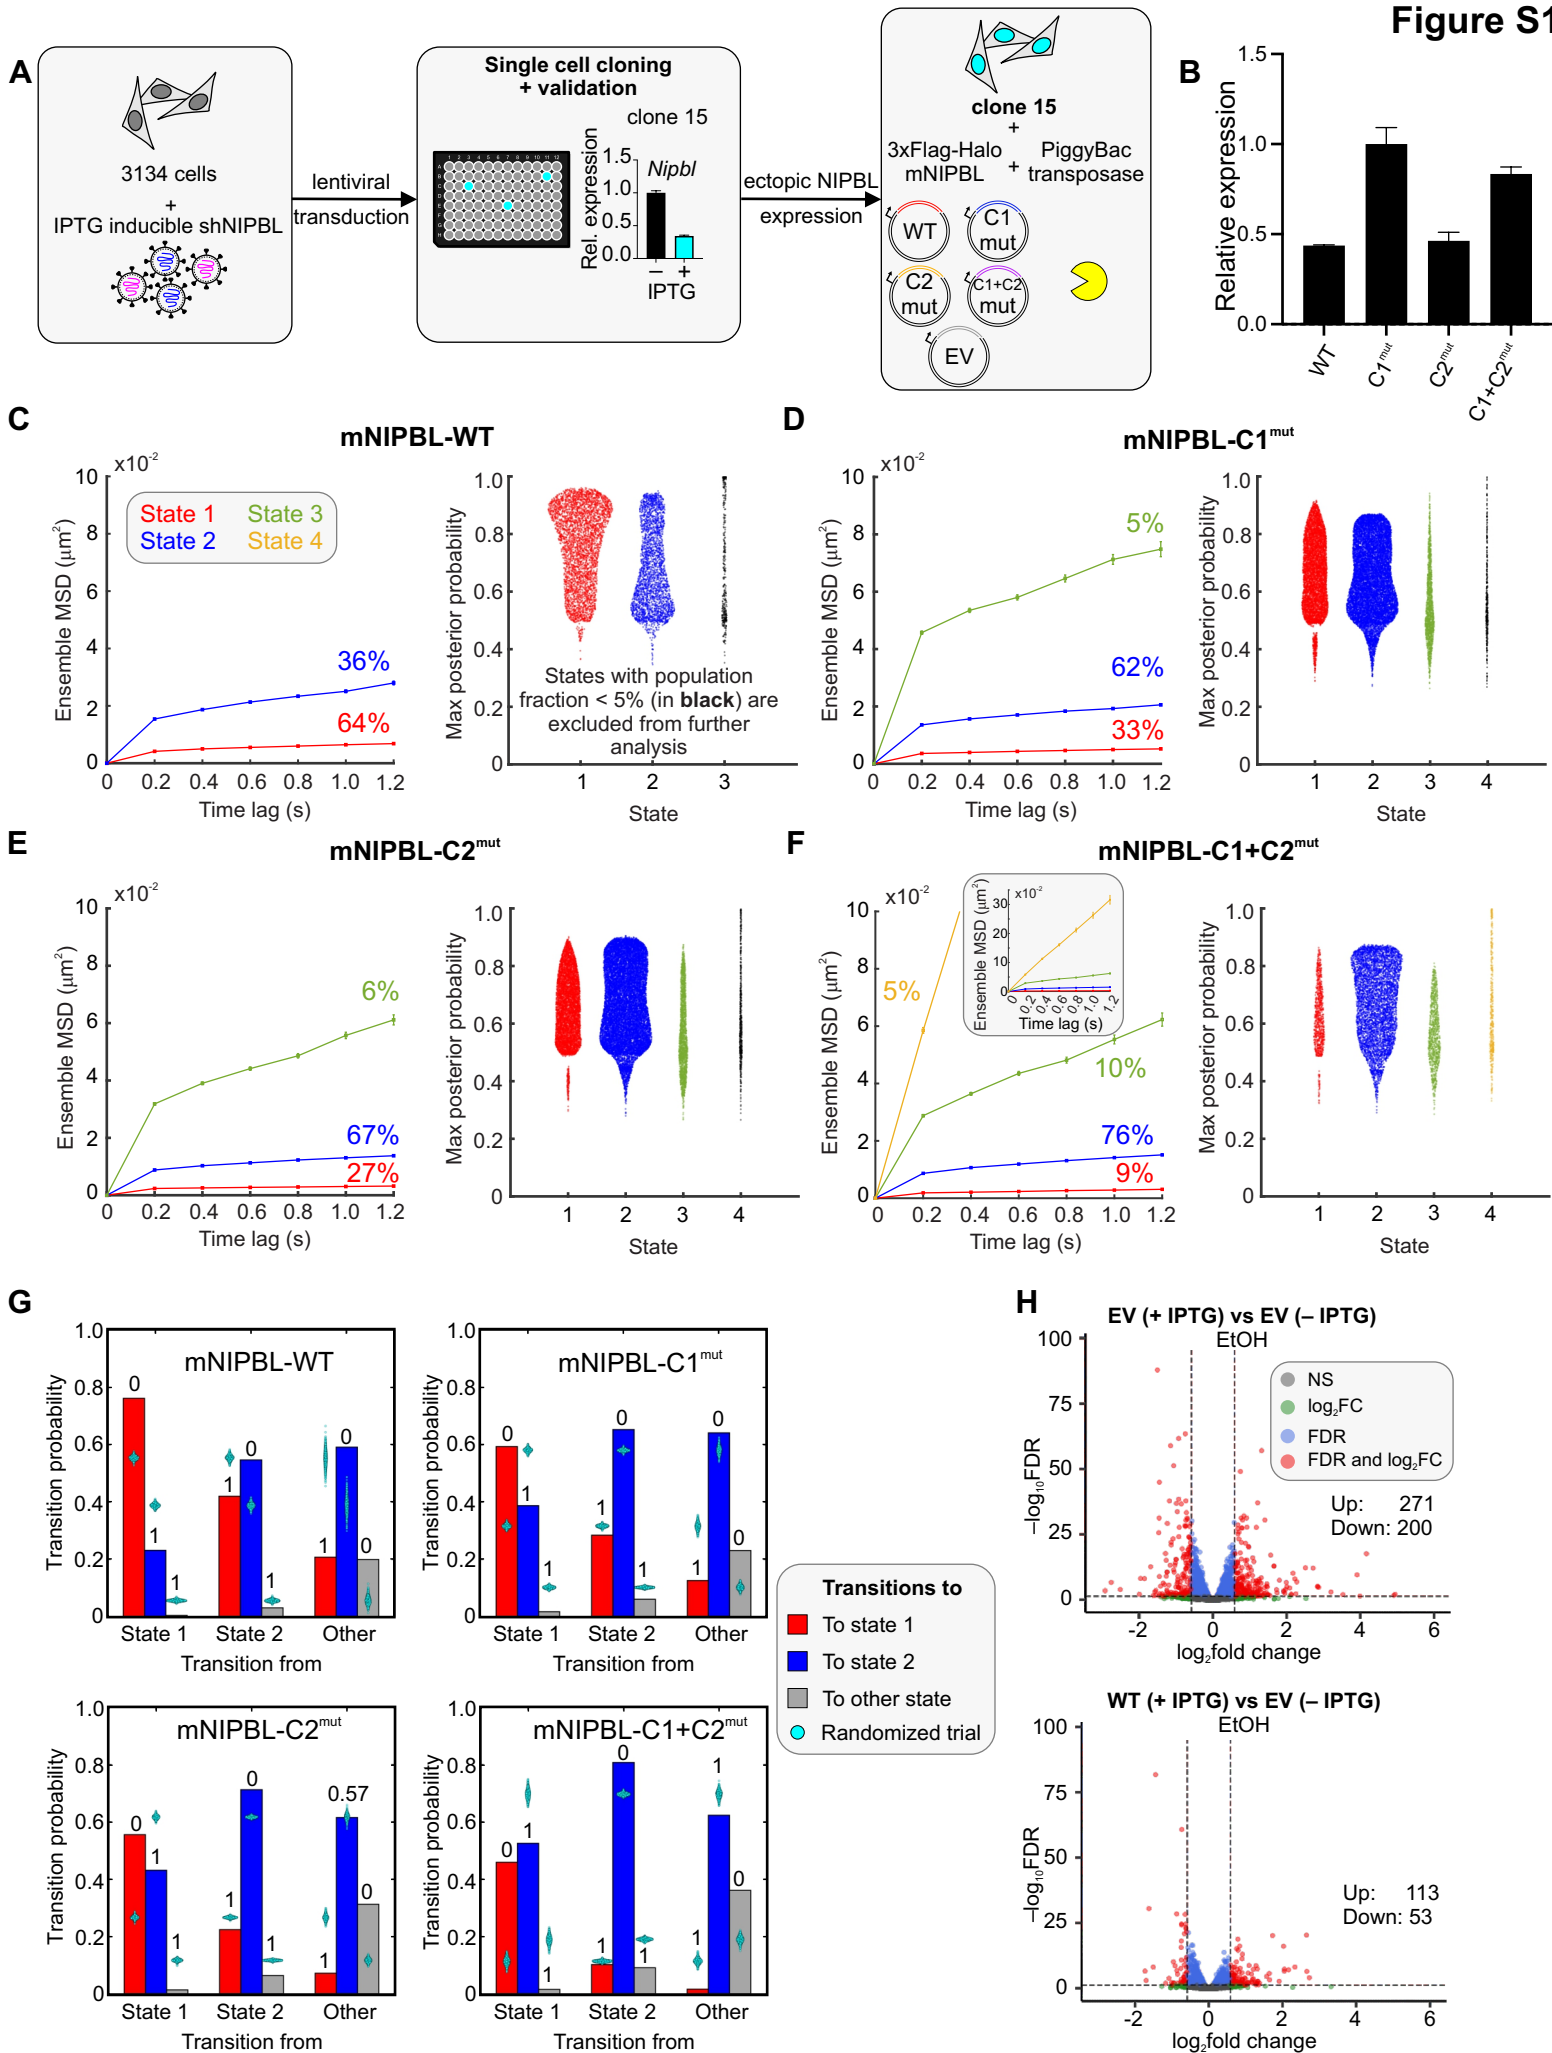

## Figure S1: The role of Leu-rich clusters in NIPBL dynamics and biology

- (A) Schematic describing the generation of the IPTG-inducible NIPBL-KD cell line, and subsequent ectopic expression of mNIPBL-WT, C1<sup>mut</sup>, C2<sup>mut</sup>, C1+C2<sup>mut</sup>, or empty vector (EV, 3xFLAG-Halo alone). The middle panel shows the reduction in *Nipbl* mRNA upon 72 h of 1 mM IPTG treatment.
- (B) RNA-seq reads of the ectopic mNIPBL constructs normalized to the highest expression. Error bars represent the standard deviation.
- (C–F) (Left) Ensemble mean-squared displacement (MSD) curves for the indicated species. State 1 is depicted in red, state 2 in blue, state 3 in green, and state 4 in yellow. The numbers above the MSD curves indicate the population fraction of the respective states. Error bars denote the standard error. (Right) Swarmcharts of the maximum posterior probability for each state detected by pEMv2. Colors match those of the states presented in the MSD plots. States with less than 5% population fraction are presented in black. Inset of panel F (left) shows the same MSD curve as panel F with higher y-axis limits.
- (G) Transition probability bar plots for transitions from the states indicated on the x-axes to state 1 (red), state 2 (blue), or any 'other' state (grey). The cyan swarmcharts show the transition probabilities calculated from 1000 randomized ensembles of trajectories and the numbers above the bars denote the fraction of randomized ensembles that have a transition probability higher than the respective calculated transition probability.
- (H) Volcano plots of the  $-\log_{10}$ FDR and  $\log_2$ (fold change) showing the differential expression of genes under basal conditions (cells grown in charcoal-stripped FBS containing medium). (Top) cl15-EV (+ IPTG) vs cl15-EV (without IPTG). (Bottom) cl15-WT (+ IPTG) vs cl15-EV (without IPTG). The black circles denote genes that do not meet either the FDR or fold-change cut-offs, green circles denote those that only meet the fold-change cut-off, blue circles denote those that only meet the FDR cut-off, and the red circles denote the genes that meet

both the fold-change and FDR cut-offs. Dashed lines indicate the FDR and fold-change thresholds. (Insets) the number of up and down-regulated genes in each condition.

Related to Figure 1.

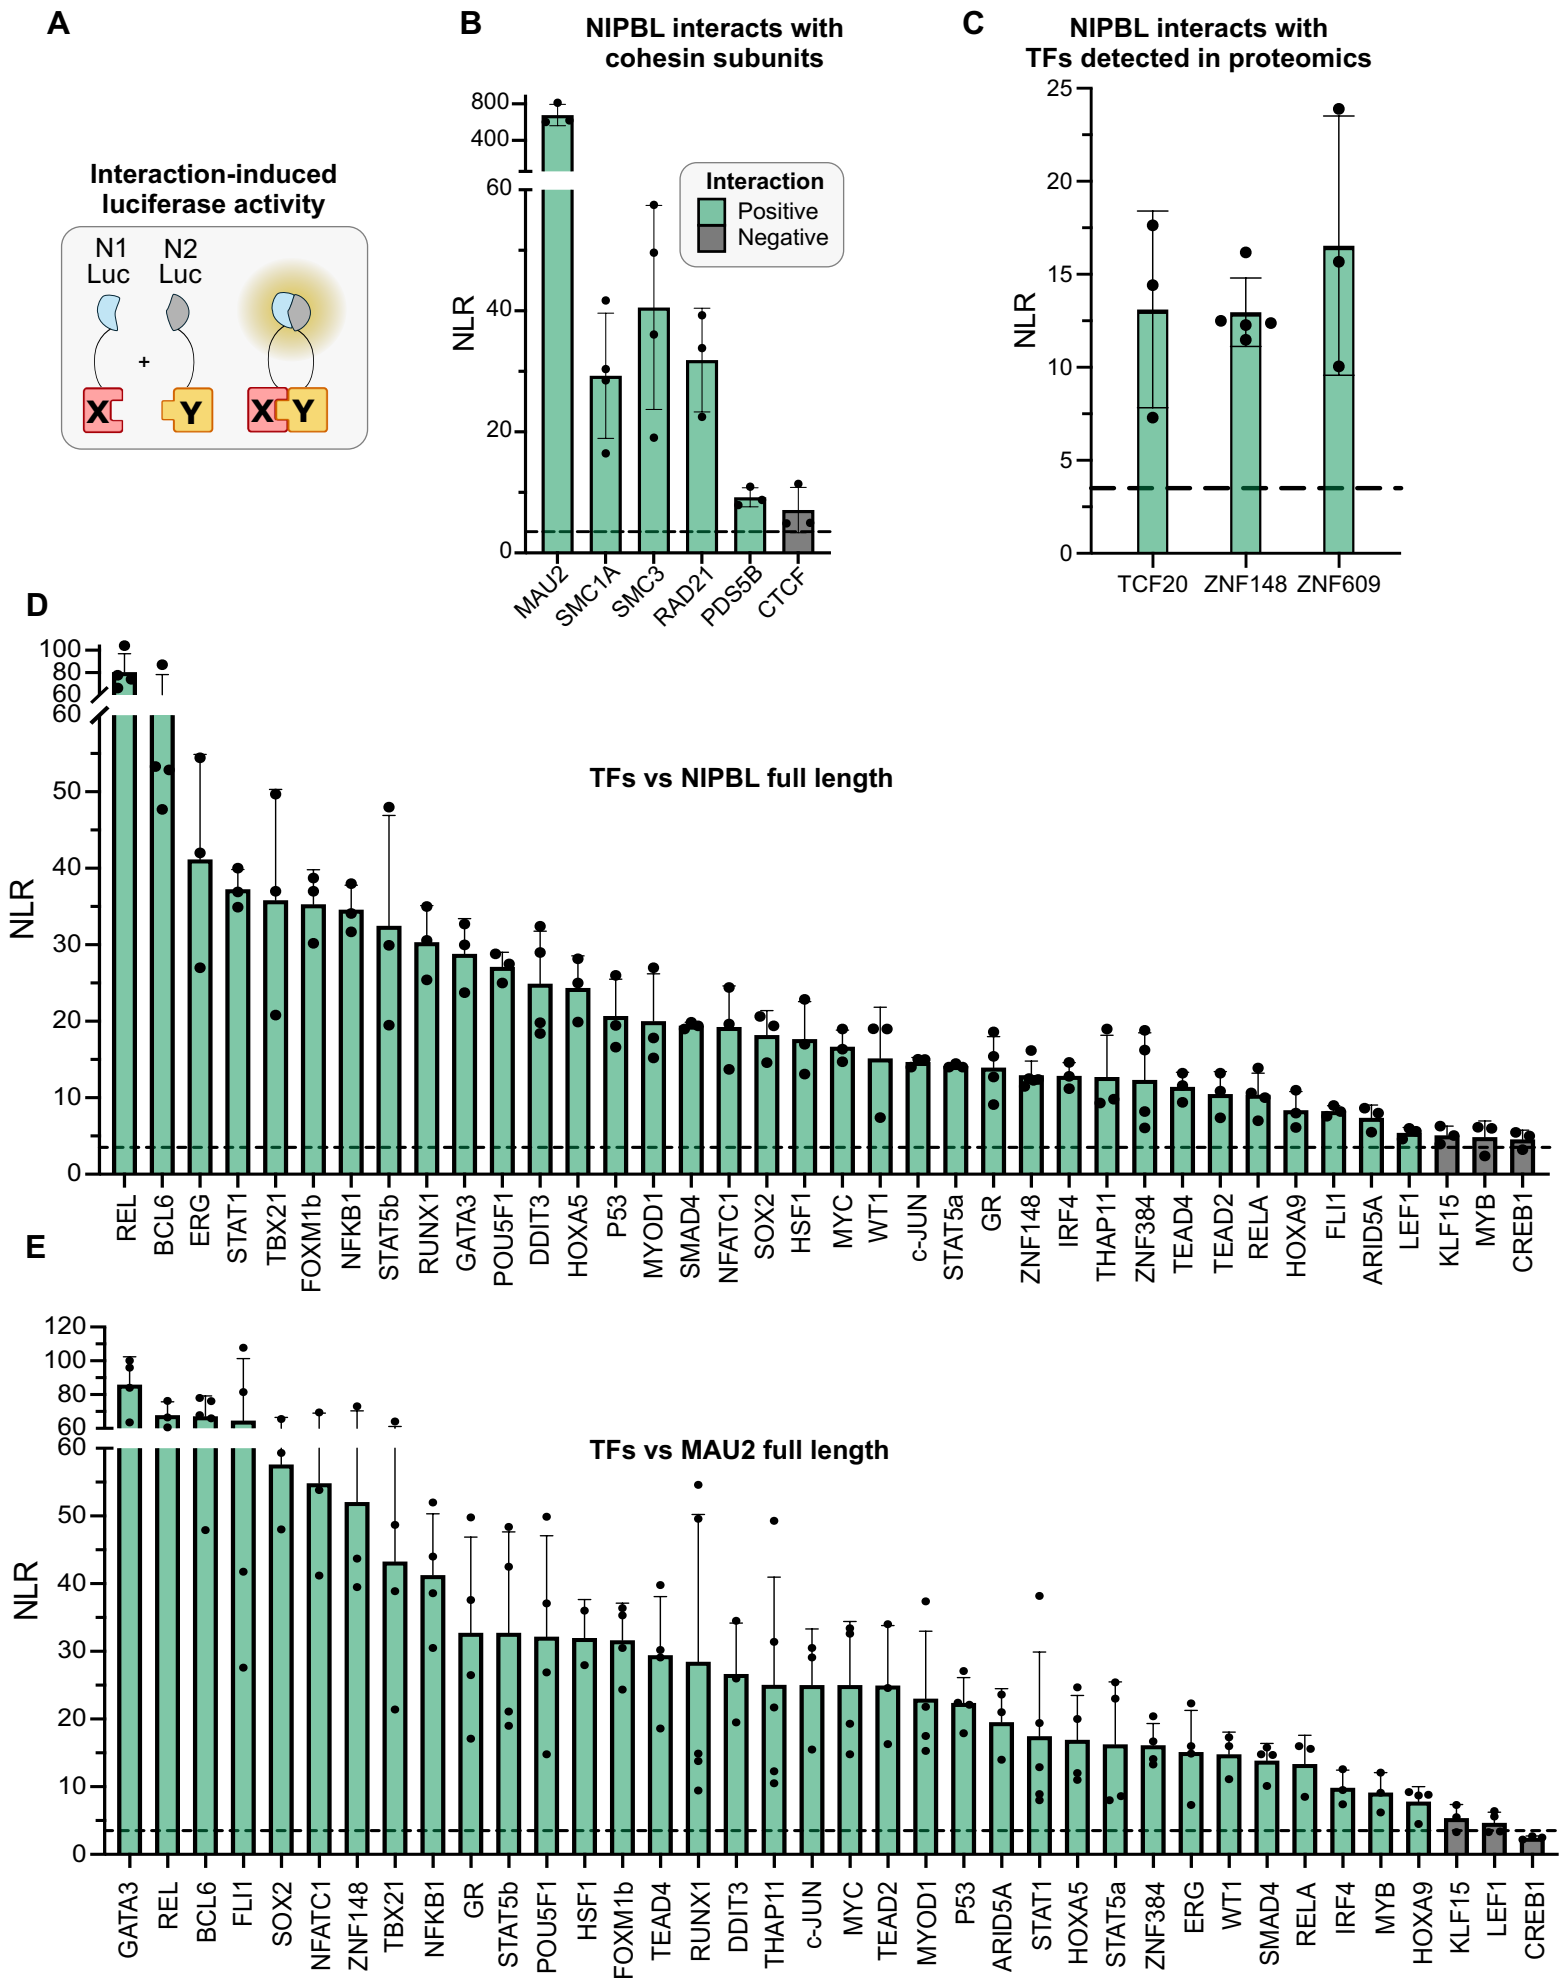

**Figure S2: Gaussia protein-fragment complementation assay (gPCA) detects direct interactions between proteins**

(A) Schematic representation of a gPCA experiments.

(B–E) Normalized luminescence ratio (NLR) for gPCA experiments measuring interactions between (A) hNIPBL-WT and cohesin sub-units and CTCF, (B) NIPBL-WT and three transcription factors (TFs) detected in the proteomics experiments, (C) NIPBL-WT and the indicated TFs, (D) hMAU2 and the indicated TFs.

Positive interactions are indicated in green while negative interactions are in black. Error bars show the standard deviation across multiple measurements.

Related to Figure 2.

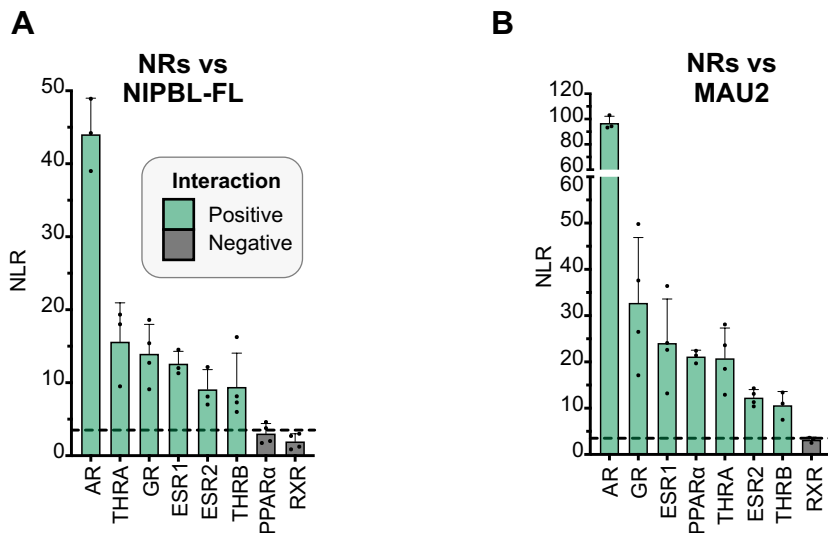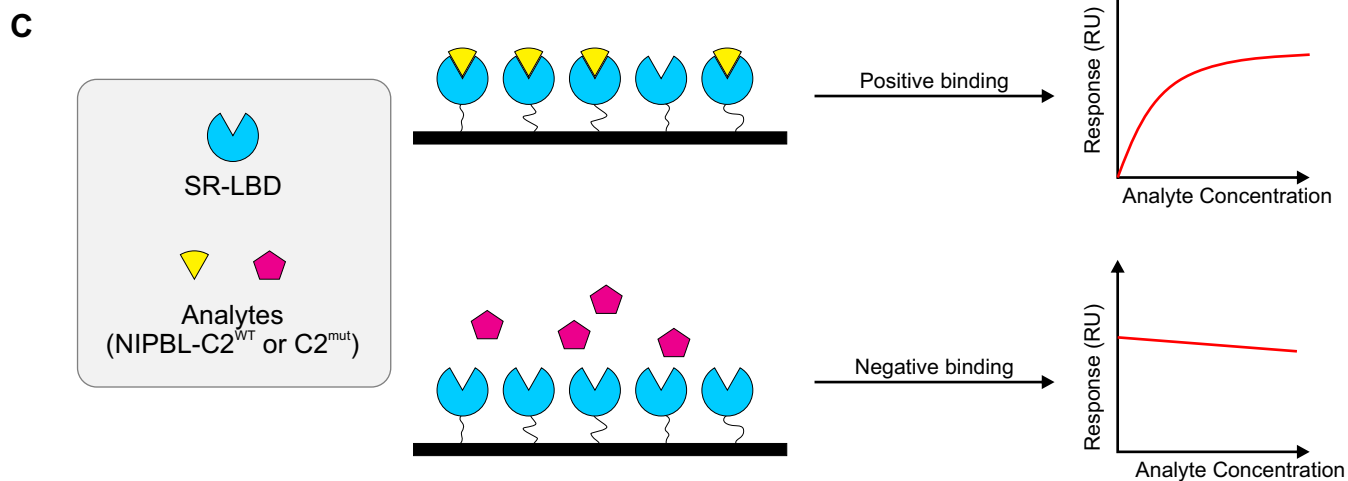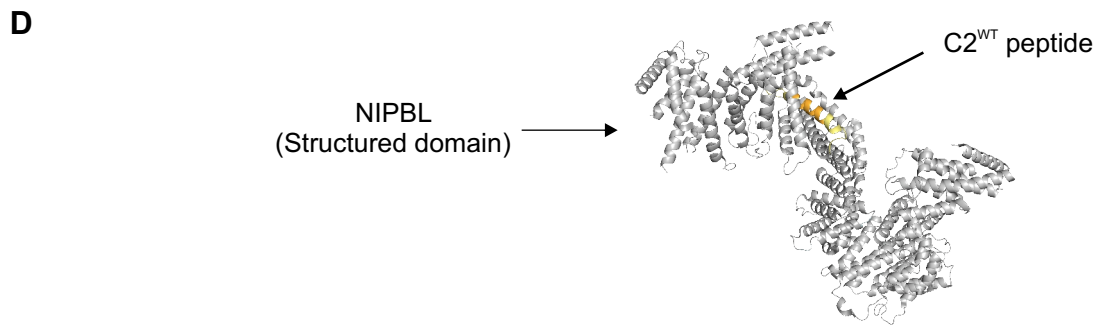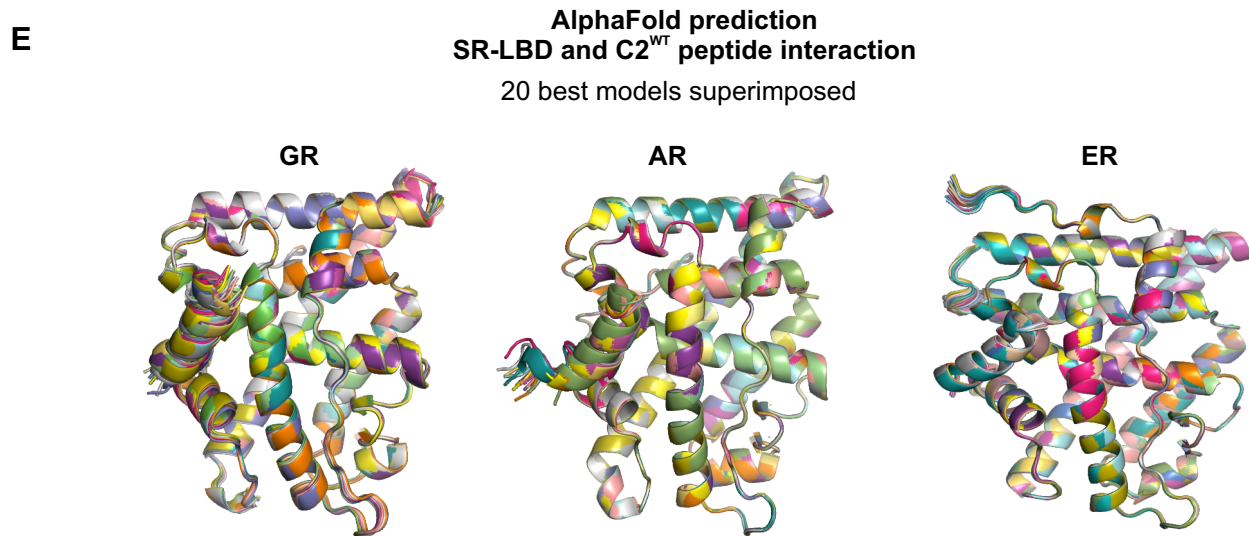

### Figure S3: NIPBL-C2 interacts with steroid receptor ligand-binding domains

(A–B) NLRs of interactions measured by gPCA between nuclear receptors and (A) full-length NIPBL-WT and (B) MAU2. Positive interactions are indicated in green while negative interactions are in black. Error bars represent the standard deviation.

(C) Schematic of a surface plasmon resonance (SPR) experiment.

(D) AlphaFold prediction of the structure of the structured region of human NIPBL containing the C2 LxxLL motif cluster. Residues from the synthesized peptide used for the SPR experiment are depicted in yellow and the exact LxxLL motif sequence used for AlphaFold2-Multimer predictions is colored in ochre.

(E) Superposition of the 20 best AlphaFold2-Multimer models showing the interaction between the C2<sup>WT</sup> peptide and (left) human GR, (middle) human AR, and (right) human ER.

Related to Figure 3.



Figure S4

Effect of LxxLL mutations on glucocorticoid signaling

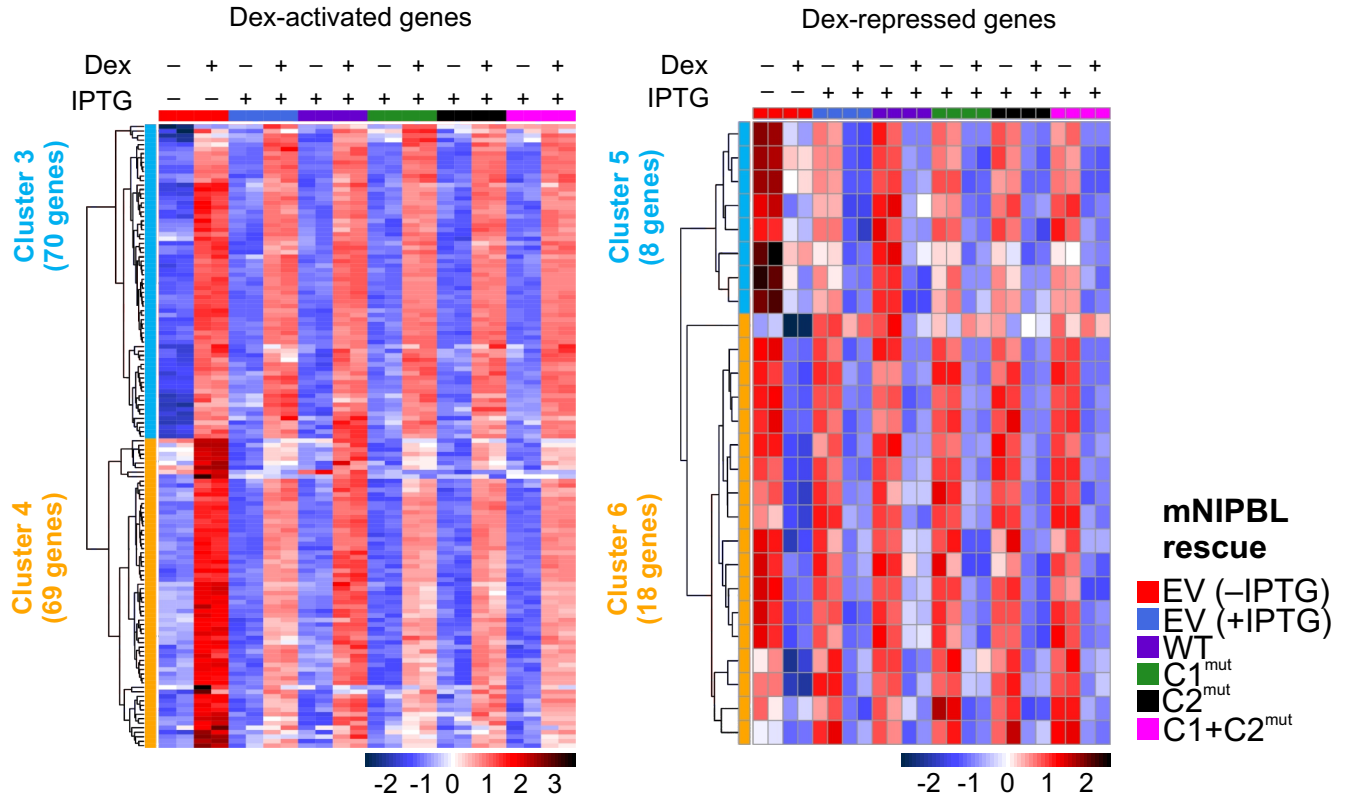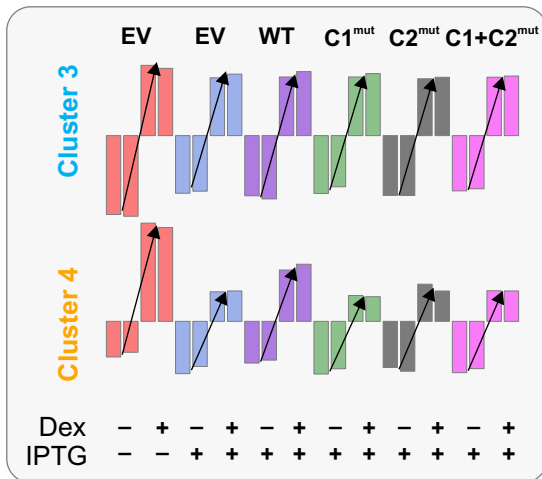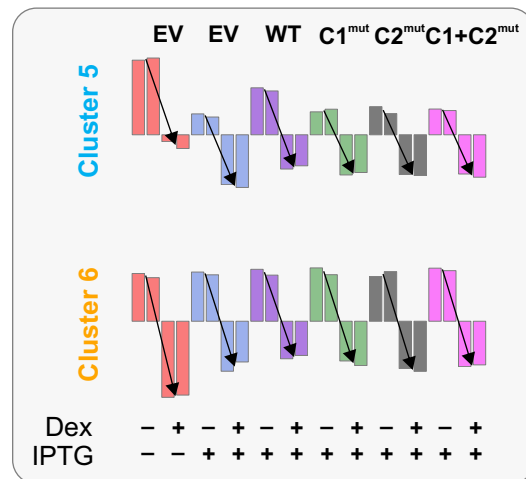

**Figure S4: NIPBL mutants alter a subset of glucocorticoid receptor-regulated genes**

Heatmap of genes whose Dex-induced fold change is significantly affected (FDR = 0.1) in at least one of the NIPBL-KD and/or NIPBL-WT/C1<sup>mut</sup>/C2<sup>mut</sup>/C1+C2<sup>mut</sup> conditions relative to EV (no IPTG, with endogenous NIPBL), separated by those activated (left) or repressed (right) in response to Dex treatment. The bottom bar plots indicate the average expression of the genes in the indicated clusters.

Related to Figure 4.

**Table S1:** Sources for the ORFs used for the gPCA experiments

| <b>ORF</b> | <b>SOURCE</b>               |
|------------|-----------------------------|
| ARID5A     | Human orfeome database v7.1 |
| BCL6       | Human orfeome database v7.1 |
| CREB1      | Human orfeome database v7.1 |
| E2F1       | Human orfeome database v7.1 |
| ESR1       | Human orfeome database v7.1 |
| ESR2       | Human orfeome database v7.1 |
| FOXM1b     | Human orfeome database v7.1 |
| GATA3      | Human orfeome database v7.1 |
| HOXA5      | Human orfeome database v7.1 |
| HOXA9      | Human orfeome database v7.1 |
| HSF1       | Human orfeome database v7.1 |
| JUN        | Human orfeome database v7.1 |
| LEF1       | Human orfeome database v7.1 |
| MYC        | Human orfeome database v8.1 |
| MYB        | Human orfeome database v7.1 |
| MYOD1      | Human orfeome database v7.1 |
| NFKB1      | Yvette Habraken Lab         |
| POU2F1     | Human orfeome database v7.1 |
| REL        | Human orfeome database v7.1 |
| RELA       | Human orfeome database v7.1 |
| RUNX1      | Human orfeome database v7.1 |
| SMAD4      | Human orfeome database v8.1 |
| STAT1      | Human orfeome database v7.1 |
| STAT5A     | Human orfeome database v7.1 |
| STAT5B     | Human orfeome database v7.1 |
| TBX21      | Human orfeome database v7.1 |
| THAP11     | Human orfeome database v7.1 |
| THRA       | Human orfeome database v7.1 |
| TP53       | Human orfeome database v7.1 |
| WT1        | Human orfeome database v7.1 |
| NIPBL      | This study                  |

|                                |                                                     |
|--------------------------------|-----------------------------------------------------|
| MAU2                           | This study                                          |
| SMC1A                          | Addgene #32363                                      |
| SMC3                           | Addgene #156447                                     |
| RAD21                          | Addgene #156445                                     |
| PDS5B                          | Addgene #156442                                     |
| CTCF                           | Addgene #40801                                      |
| AR                             | Gordon Hager Lab                                    |
| THRB                           | Gordon Hager Lab                                    |
| GR                             | Gordon Hager Lab                                    |
| PPAR $\alpha$                  | Gordon Hager Lab                                    |
| RXR                            | Gordon Hager Lab                                    |
| DDIT3                          | Human orfeome database v8.1                         |
| NFATC1                         | Human orfeome database v8.1                         |
| SOX2                           | Human orfeome database v8.1                         |
| c-JUN                          | Yvette Habraken Lab                                 |
| ZNF148                         | Human orfeome database v8.1                         |
| IRF4                           | Human orfeome database v8.1                         |
| ZNF384                         | Human orfeome database v7.1                         |
| TEAD2                          | Human orfeome database v8.1                         |
| TEAD4                          | Human orfeome database v8.1                         |
| FLI1                           | Human orfeome database v7.1                         |
| KLF15                          | Human orfeome database v8.1                         |
| TCF20                          | PMID 35074918                                       |
| ZNF609                         | PMID 28041881                                       |
| GR- $\Delta$ NTD               | Cloned from pDONOR-GR                               |
| GR- $\Delta$ LBD               | Cloned from pDONOR-GR                               |
| NIPBL C1 <sup>WT</sup> domain  | Cloned from pPB-3xFLAG-Halo-NIPBL-WT                |
| NIPBL C2 <sup>WT</sup> domain  | Cloned from pPB-3xFLAG-Halo-NIPBL-WT                |
| NIPBL C2 <sup>mut</sup> domain | Cloned from pPB-3xFLAG-Halo-NIPBL-C2 <sup>mut</sup> |

**Table S2:** Forward and reverse primers for the cloning of gPCA ORFs

|                                      | <b>PRIMER FWD AttB1</b>                                           | <b>PRIMER REV AttB2</b>                                                   |
|--------------------------------------|-------------------------------------------------------------------|---------------------------------------------------------------------------|
| NIPBL<br>C1 <sup>WT</sup><br>domain  | GGGGACAACCTTTGTACAAAAAA<br>GTTGGCATGGCCGGAATCGCT<br>TCTCTGAC      | GGGGACAACCTTTGTACAAGAAAGT<br>TGCATGCCGCTCTGCACGTATC                       |
| NIPBL<br>C2 <sup>WT</sup><br>domain  | GGGGACAACCTTTGTACAAAAAA<br>GTTGGCATGTACATCCAGATGG<br>TTACAGCTCTGG | GGGGACAACCTTTGTACAAGAAAGT<br>TGCTCTCCCAGGACTCTCAGGATC                     |
| NIPBL<br>C2 <sup>mut</sup><br>domain | GGGGACAACCTTTGTACAAAAAA<br>GTTGGCATGTACATCCAGATGG<br>TTACAGCTCTGG | GGGGACAACCTTTGTACAAGAAAGT<br>TGCTCTCCCAGGACTCTCAGGATC                     |
| GR-<br>ΔNTD                          | GGGGACAACCTTTGTACAAAAAA<br>GTTGGCATGAGACCAGATGTG<br>AGTTCTCCTCC   | GGGGACAACCTTTGTACAAGAAAGT<br>TGTTTCTGATGAAACAGAAGCTTTT<br>TGATATTTCCATTTG |
| GR-<br>ΔLBD                          | GGGGACAACCTTTGTACAAAAAA<br>GTTGGCATGGACTCCAAAGAAT<br>CCTTAGCTCCCC | GGGGACAACCTTTGTACAAGAAAGT<br>TGGTCTTGTGAGACTCCTGCAGTG                     |
| NIPBL                                | GGGGACAACCTTTGTACAAAAAA<br>GTTGGCATGAACGGCGACATG<br>CCTCACGTGC    | GGGGACAACCTTTGTACAAGAAAGT<br>TGAAGAGCTTGTGCCGTCCTTAGC<br>AGCG             |
| MAU2                                 | GGGGACAACCTTTGTACAAAAAA<br>GTTGGCATGGCGGCACAGGCG<br>GCGG          | GGGGACAACCTTTGTACAAGAAAGT<br>TGCAGAAGGCTGGCCAGGCTGG                       |
| SMC1A                                | GGGGACAACCTTTGTACAAAAAA<br>GTTGGCATGGGGTTCCTGAAA<br>CTGATTGAG     | GGGGACAACCTTTGTACAAGAAAGT<br>TGCTGCTCATTGGGGTTGGGG                        |
| SMC3                                 | GGGGACAACCTTTGTACAAAAAA<br>GTTGGCATGTACATCAAGCAG<br>GTGATCATCCAG  | GGGGACAACCTTTGTACAAGAAAGT<br>TGACCATGCGTGGTATCGTCTTC                      |
| RAD21                                | GGGGACAACCTTTGTACAAAAAA<br>GTTGGCATGTTCTACGCACATT<br>TTGTCCTCAG   | GGGGACAACCTTTGTACAAGAAAGT<br>TGATAATATGGAACCGTGGTCCA<br>GGG               |
| PDS5B                                | GGGGACAACCTTTGTACAAAAAA<br>GTTGGCATGGCTCATTCAAAGA<br>CAAGGACC     | GGGGACAACCTTTGTACAAGAAAGT<br>TGTCGTCTCTCTCGTTTGGAGCTTC                    |
| CTCF                                 | GGGGACAACCTTTGTACAAAAAA<br>GTTGGCATGGAAGGTGAGGCG<br>GTTG          | GGGGACAACCTTTGTACAAGAAAGT<br>TGCCGGTCCATCATGCTGAGG                        |
| AR                                   | GGGGACAACCTTTGTACAAAAAA<br>GTTGGCATGGAAGTGCAGTTA<br>GGGCTGGG      | GGGGACAACCTTTGTACAAGAAAGT<br>TGCTGGGTGTGGAATAGATGGGC                      |
| THRB                                 | GGGGACAACCTTTGTACAAAAAA<br>GTTGGCATGGCGATCGCCATG<br>ACTCCC        | GGGGACAACCTTTGTACAAGAAAGT<br>TGAACATCCTCGAACACTTCCAAGA<br>AC              |

|               |                                                                  |                                                                      |
|---------------|------------------------------------------------------------------|----------------------------------------------------------------------|
| GR            | GGGGACAACCTTTGTACAAAAAA<br>GTTGGCATGGACTCCAAAGAAT<br>CCTTAGCTCCC | GGGGACAACCTTTGTACAAGAAAGT<br>TGTTTCTGATGAAACAGAAGCTTTT<br>TGATATTTCC |
| PPAR $\alpha$ | GGGGACAACCTTTGTACAAAAAA<br>GTTGGCATGGTGGACACGGAA<br>AGCCAC       | GGGGACAACCTTTGTACAAGAAAGT<br>TGAACGTACATGTCCCTGTAGATCT<br>CC         |
| RXR           | GGGGACAACCTTTGTACAAAAAA<br>GTTGGCATGGACACCAAACATT<br>TCCTGCCG    | GGGGACAACCTTTGTACAAGAAAGT<br>TGAACAGTCATTTGGTGCGGC                   |
| TCF20         | GGGGACAACCTTTGTACAAAAAA<br>GTTGGCATGCAGTCCTTTTCGG<br>GAGCAAAGC   | GGGGACAACCTTTGTACAAGAAAGT<br>TGTCTCCACAGTCTCACCTTGTGCT<br>TAG        |
| ZNF609        | GGGGACAACCTTTGTACAAAAAA<br>GTTGGCATGTCCTTGAGCAGT<br>GGAGCCTG     | GGGGACAACCTTTGTACAAGAAAGT<br>TGCCTCCGGGGGGGTGG                       |

**Video S1: Representative fast SMT movies for NIPBL-WT and mutants**

Montage of representative SMT movies collected with the fast SMT protocol (exposure time = 12 ms, interval = 12 ms). Left to right: mNIPBL-WT, C1<sup>mut</sup>, C2<sup>mut</sup>, and C1+C2<sup>mut</sup>. Trajectories longer than 7 frames are shown in red. Scale bar = 2  $\mu$ m and playback speed in 125 frames/s.

Related to Figure 1.

**Video S2: Representative intermediate SMT movies for NIPBL-WT and mutants**

Montage of representative SMT movies collected with the intermediate SMT protocol (exposure time = 10 ms, interval = 200 ms). Left to right: mNIPBL-WT, C1<sup>mut</sup>, C2<sup>mut</sup>, and C1+C2<sup>mut</sup>. Trajectories longer than 7 frames are shown in red. Scale bar = 2  $\mu$ m and playback speed in 50 frames/s.

Related to Figure 1.
